# Supplementary material
Source: HighWire-hosted journal article supplement (https://bmjopen.bmj.com/content/9/1/e023010)
Supplement: inline-supplementary-material-1 [file inline-supplementary-material-1.pdf]

**Table 1: Denominator data for Homeless Population 2011-2014 by age and gender**

| Gender                | 2011        |             | 2012        |             | 2013        |             | 2014        |             | 2015        |             |
|-----------------------|-------------|-------------|-------------|-------------|-------------|-------------|-------------|-------------|-------------|-------------|
|                       | Male        | Female      | Male        | Female      | Male        | Female      | Male        | Female      | Male        | Female      |
| 18-24                 | 386         | 249         | 440         | 262         | 521         | 313         | 512         | 395         | 456         | 480         |
| 25-44                 | 1488        | 476         | 1729        | 595         | 1959        | 747         | 2092        | 1027        | 2121        | 1328        |
| 45-64                 | 461         | 77          | 522         | 105         | 643         | 150         | 694         | 200         | 768         | 243         |
| 65+                   | 34          | 6           | 42          | 8           | 45          | 12          | 42          | 15          | 53          | 22          |
| Missing data          | 1,232       | 369         | 875         | 286         | 153         | 62          |             |             | 1           | 9           |
| <b>Total All Ages</b> | <b>3601</b> | <b>1177</b> | <b>3608</b> | <b>1256</b> | <b>3321</b> | <b>1284</b> | <b>3340</b> | <b>1637</b> | <b>3399</b> | <b>2082</b> |

**Table 2: Denominator data for General Population 2011-2015 by age and gender**

| Age                   | 2011           |                | 2012           |                | 2013           |                | 2014           |                | 2015          |               |
|-----------------------|----------------|----------------|----------------|----------------|----------------|----------------|----------------|----------------|---------------|---------------|
|                       | Male           | Female         | Male           | Female         | Male           | Female         | Male           | Female         | Male          | Female        |
| 18-24                 | 63711          | 67234          | 54917          | 56078          | 50903          | 48749          | 48472          | 44755          | 47109         | 44691         |
| 25-44                 | 218986         | 225914         | 215490         | 227467         | 216450         | 227647         | 171245         | 229773         | 224521        | 230448        |
| 45-64                 | 130529         | 140161         | 131813         | 140808         | 133881         | 142285         | 183566         | 1442235        | 138373        | 148366        |
| 65+                   | 59804          | 79472          | 61878          | 81308          | 64421          | 83548          | 66966          | 86149          | 69719         | 88336         |
| <b>Total All Ages</b> | <b>473,030</b> | <b>512,781</b> | <b>464,098</b> | <b>505,661</b> | <b>465,655</b> | <b>502,229</b> | <b>470,249</b> | <b>504,912</b> | <b>479722</b> | <b>511841</b> |

**Table 3: Numerator data deaths in General Population 2011-2015 by age and gender**

| Deaths in General Population County Dublin By Gender & Age Group 2005-2015 |           |             |             |             |             |             |
|----------------------------------------------------------------------------|-----------|-------------|-------------|-------------|-------------|-------------|
| Gender                                                                     | Age Group | 2011        | 2012        | 2013        | 2014        | 2015        |
| Male                                                                       | 18-24     | 45          | 26          | 35          | 38          | 19          |
|                                                                            | 25-44     | 246         | 262         | 196         | 189         | 172         |
|                                                                            | 45-64     | 717         | 749         | 693         | 702         | 551         |
|                                                                            | 65+       | 2555        | 2662        | 2597        | 2716        | 2429        |
| Male Total                                                                 |           | <b>3563</b> | <b>3699</b> | <b>3521</b> | <b>3645</b> | <b>3171</b> |
| Female                                                                     | 18-24     | 12          | 10          | 12          | 10          | 5           |
|                                                                            | 25-44     | 113         | 129         | 114         | 128         | 84          |
|                                                                            | 45-64     | 495         | 487         | 490         | 450         | 398         |
|                                                                            | 65+       | 3154        | 3178        | 3323        | 3244        | 3153        |
| Female Total                                                               |           | <b>3774</b> | <b>3804</b> | <b>3939</b> | <b>3832</b> | <b>3640</b> |
| <b>Grand Total</b>                                                         |           | <b>7337</b> | <b>7503</b> | <b>7460</b> | <b>7577</b> | <b>6811</b> |

**Table 4: Cause of death 2011-2015**

| CAUSE OF DEATH                       | 2011 | 2012 | 2013 | 2014 | 2015 | TOTAL |
|--------------------------------------|------|------|------|------|------|-------|
| <u>Drug and Alcohol</u> <sup>1</sup> | 7    | 9    | 14   | 18   | 27   | 75    |
| Circulatory <sup>2</sup>             | 1    | 7    | 6    | 11   | 5    | 30    |
| Respiratory                          | 2    | 5    | 6    | 7    | 6    | 26    |
| Gastrointestinal                     | 1    | 5    | 2    | 3    | 3    | 14    |
| Unnatural                            | 1    | 3    | 2    | 4    | 9    | 19    |
| Cancer                               | 2    | 1    | 2    | 3    | 2    | 10    |
| Other                                | 3    | 4    | 3    | 3    | 8    | 21    |
| Outstanding Inquest                  | 0    | 0    | 0    | 0    | 6    | 6     |
| <b>Total</b>                         | 17   | 34   | 35   | 49   | 66   | 201   |

---

<sup>1</sup> Drug and alcohol as a direct cause of death represent a minimum. Drug and alcohol figures in table 8 refer to 'disease or condition leading directly to death' in a further 60 cases (17.8%) deaths drug and alcohol was an 'antecedent or significant factor, which contributed to the death see table 9. In addition, some inquests were outstanding.
